# Supplementary material
Source: MDPI journal article supplement (https://www.mdpi.com/2504-3900/97/1/105)
Supplement: s1 [file s1 › proceedings-2936274-supplementary.pdf]

## Supplementary Materials:

**Table S1.** Comparison between recent studies and their fabrication approach.

| Active Layer Mold   | Layer Uniformity | Ease of Fabrication | Shape/Size Versatility | Scalability | Miniaturization | Ref.      |
|---------------------|------------------|---------------------|------------------------|-------------|-----------------|-----------|
| 3D printed          | ✓                | ✓                   | ✓                      | ✓           | ✗               | [4]       |
| Sugar cube template | ✗                | ✓                   | ✗                      | ✗           | ✓               | [5]       |
| Si-based            | ✓                | ✗                   | ✓                      | ✓           | ✗               | [6]       |
| SU8                 | ✓                | ✗                   | ✓                      | ✓           | ✗               | [7]       |
| Photoresist         | ✓                | ✗                   | ✓                      | ✓           | ✗               | [1]       |
| Photoresist         | ✓                | ✓                   | ✓                      | ✓           | ✓               | This work |

For parallel-plate capacitive sensors, the capacitance ( $C$ ) can be expressed using equation (S1):

$$C = \frac{\epsilon_0 \epsilon_r A}{d} \quad (S1)$$

where  $\epsilon_r$  is the relative constant of the dielectric material,  $\epsilon_0$  is the permittivity of free space,  $A$  is the opposite area of the electrodes, and  $d$  is the distance between the electrode plates. Equation (S2) is based in the work of Zhang, W. et al [8] who developed an equation model to determine the nominal capacitance of a microstructured dielectric layer. The adaptation was made to include two lamination layers between the conical structures and the electrodes. This was done with the purpose of simulating a design closer to the fabricated one.

$$C = \frac{\epsilon_0 A}{d} \cdot [\epsilon_{air}(1 - \eta) + \epsilon_{dielectric}\eta] \quad (S2)$$

With

$$\eta = \frac{1}{3}\pi R^2 h a^2 + 2Al \quad (S3)$$

and

$$d = h + 2l \quad (S4)$$

where  $\epsilon_{air}$  is the permittivity of the air,  $\epsilon_{dielectric}$  is the permittivity of the dielectric material,  $\eta$  is the occupied volume of the microstructured dielectric layer,  $R$  is the radius of the micro-cone base,  $h$  is the height of the micro-cone,  $a$  is the number of micro-cones in the row of the array, and  $l$  is the thickness of the lamination layer.

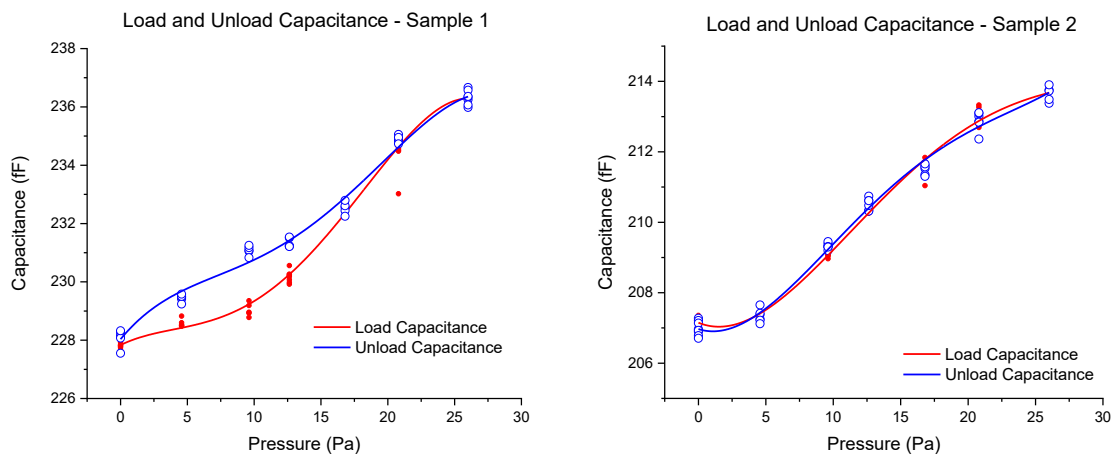

**Figure S1.** Load (red) and unload (blue) capacitance of sample 1 (left) and sample 2 (right).

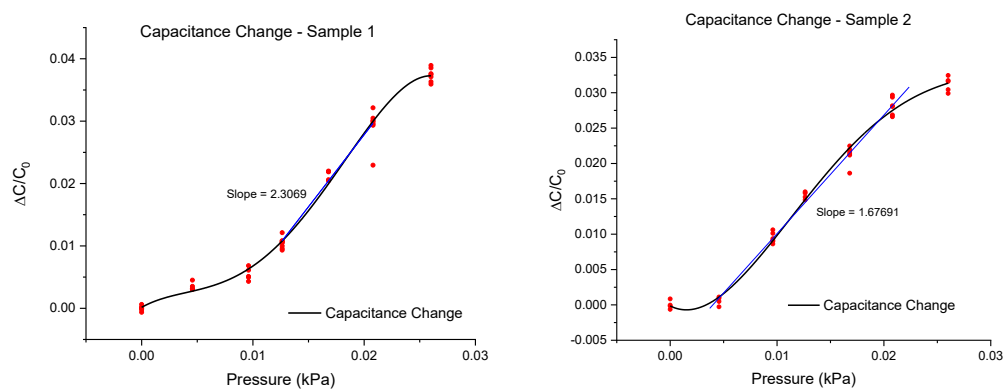

**Figure S2.** Sample 1 capacitance change (left) with sensitivity of 2.3069 kPa<sup>-1</sup>. Sample 2 capacitance change (right) with sensitivity of 1.67691 kPa<sup>-1</sup>.
